# Supplementary material for: Fe-Co Alloy Nanoparticles Dispersed in Polymer-Derived Carbon Support: Effect of Initial Polymer Nature on the Size, Structure and Magnetic Properties
Source: MDPI journal article supplement (doi:10.3390/ma16206694), 2023-10-14
Supplement: s1 [file s1]

# Fe-Co Alloy Nanoparticles Dispersed in Polymer-Derived Carbon Support: Effect of Initial Polymer Nature on the Size, Structure and Magnetic Properties

Andrey Vasilev <sup>1</sup>, Mikhail Efimov <sup>1</sup>, Dmitry Muratov <sup>1</sup>, Petr Chernavskii <sup>1,2</sup>, Kirill Cherednichenko <sup>3</sup>, Ella Dzidziguri <sup>4</sup> and Galina Karpacheva <sup>1,\*</sup>

<sup>1</sup> A.V. Topchiev Institute of Petrochemical Synthesis RAS, Leninskiy Prospekt 29, Moscow 119991, Russia; vasilev@ips.ac.ru (A.V.); efimov@ips.ac.ru (M.E.); muratov@ips.ac.ru (D.M.); chern5@inbox.ru (P.C.)

<sup>2</sup> Department of Chemistry, Lomonosov Moscow State University, Leninskie Gory 1–3, Moscow 119991, Russia

<sup>3</sup> Department of Physical and Colloidal Chemistry, National University of Oil and Gas “Gubkin University”, Leninskiy Prospekt 65, Moscow 119991, Russia; cherednichenko.k@gubkin.ru

<sup>4</sup> Department of Functional Nanosystems and High-Temperature Materials, National University of Science and Technology “MISiS”, Leninskiy Prospekt 4, Moscow 119049, Russia; avrore@gmail.com

\* Correspondence: gpk@ips.ac.ru

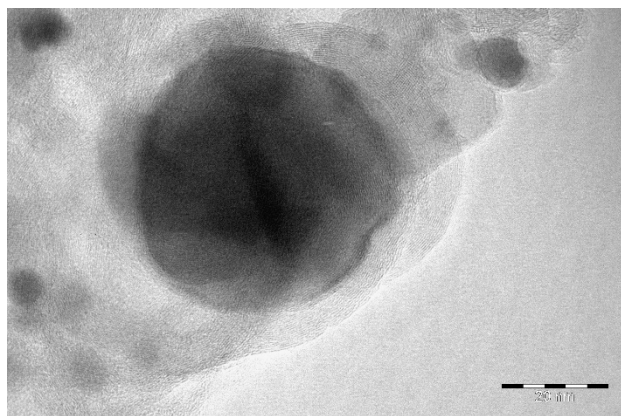

(a)

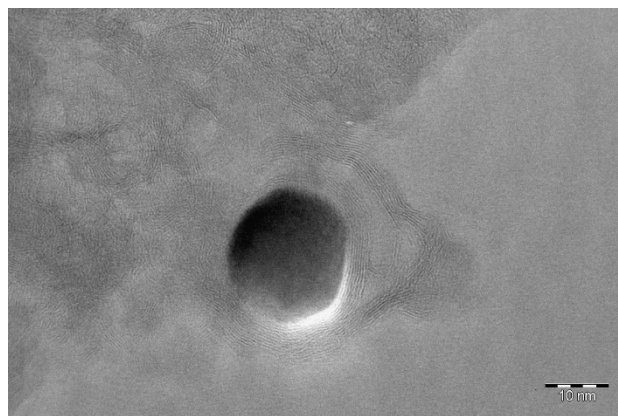

(b)

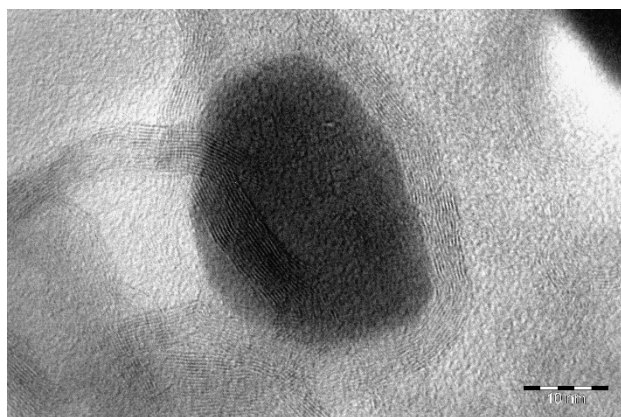

(c)

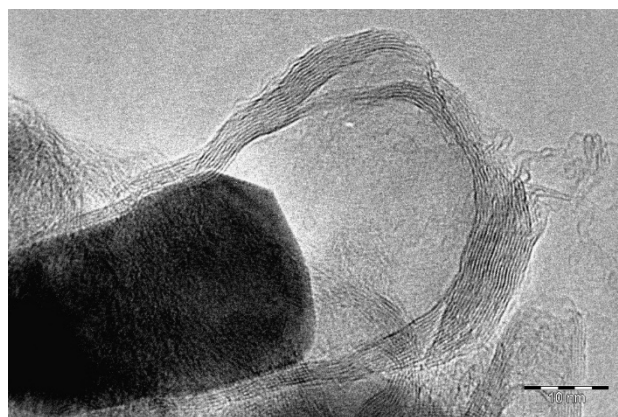

(d)

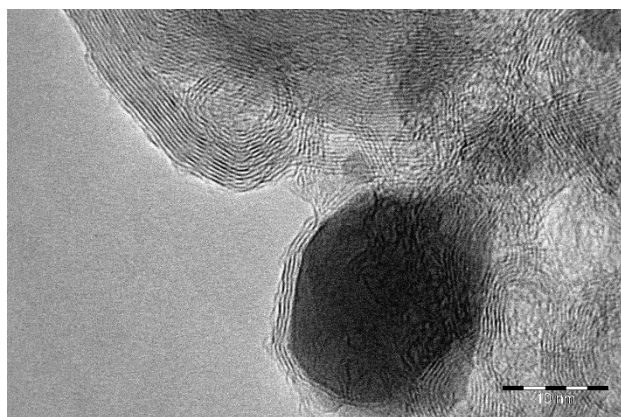

(e)

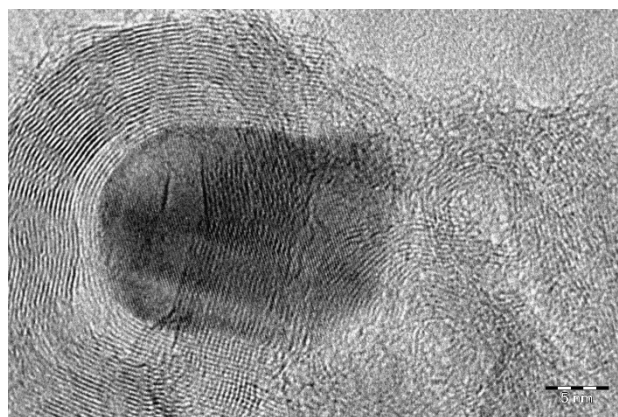

(f)

Figure S1. HR-TEM micrographs of IR-PAN/FeCo 600 °C (a), IR-PAN/FeCo 700 °C (b), IR-PVA/FeCo 600 °C (c), IR-PVA/FeCo 700 °C (d), IR-CS/FeCo 600 °C (e) and IR-CS/FeCo 700 °C (f) nanocomposites.
